# Supplementary material for: Derivatization-assisted dual-mode colorimetric and fluorometric detection of dopamine using 4-hexyl resorcinol
Source: Royal Society of Chemistry journal article supplement (doi:10.1039/d6ra02276f), 2026-05-15
Supplement: d6ra02276f1.pdf [file d6ra02276f1.pdf]

## **Electronic Supplementary Material**

### **Derivatization-assisted dual-mode colorimetric and fluorometric detection of dopamine using 4-hexyl resorcinol**

**Mohamed N. Goda<sup>a</sup>, Laila S. Alqarni<sup>a</sup>, Faisal K. Algethami<sup>a</sup>, Hossieny Ibrahim<sup>b</sup>,**

**Al-Montaser Bellah H. Ali<sup>c</sup>, Ramadan Ali<sup>d</sup>, Mohamed M. El-Wakil<sup>b, c\*</sup>**

<sup>a</sup> Department of Chemistry, College of Science, Imam Mohammad Ibn Saud Islamic University (IMSIU), Riyadh 11623, Saudi Arabia

<sup>b</sup> School of Biotechnology, Badr University in Assiut (BUA), Assiut 2014101, Egypt

<sup>c</sup> Department of Pharmaceutical Analytical Chemistry, Faculty of Pharmacy, Assiut University, Assiut, Egypt

<sup>d</sup> Department of Pharmaceutical Chemistry, Faculty of Pharmacy, University of Tabuk, Tabuk 71491, Saudi Arabia

#### **Correspondence**

**\*mohamed.elwakeel@pharm.aun.edu.eg, mohamed.mohamoud@ymail.com**

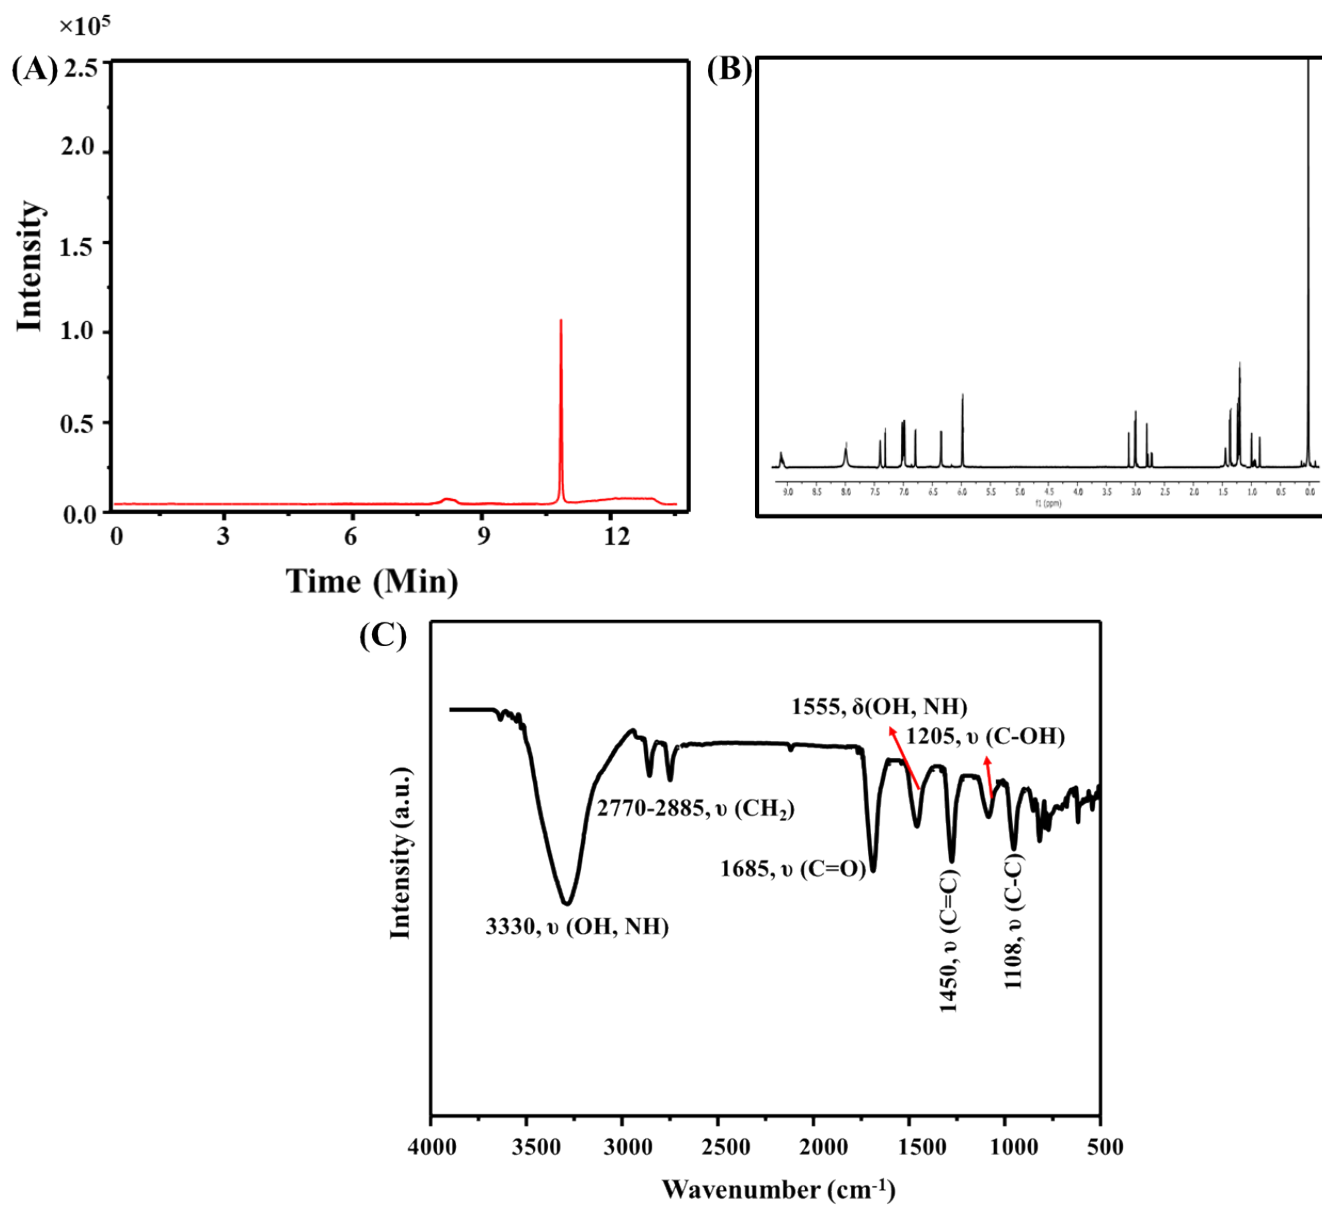

**Fig. S1** (A) Chromatogram of separated DA and azamonardine; (B)  $^1\text{H-NMR}$  of azamonardine; (C) FT-IR (B) of the azamonardine.

**Table S1** Gradient elution program

| <b>Time(min)</b> | <b>Mobile phase methanol (%)</b> | <b>Mobile phase 0.048 g/mL acetate solution (%)</b> |
|------------------|----------------------------------|-----------------------------------------------------|
| <b>0.0</b>       | 10                               | 90                                                  |
| <b>2.0</b>       | 10                               | 90                                                  |
| <b>6.0</b>       | 65                               | 35                                                  |
| <b>14</b>        | 65                               | 35                                                  |
| <b>19</b>        | 10                               | 90                                                  |
| <b>25</b>        | 10                               | 90                                                  |
